# Supplementary material for: Turbulent coherent structures and early life below the Kolmogorov scale
Source: PubMed Central journal article supplement (PMC7198613; doi:10.1038/s41467-020-15780-1), 2020-05-04
Supplement: 41467_2020_15780_MOESM3_ESM.pdf [file 41467_2020_15780_MOESM3_ESM.pdf]

### **Description of Additional Supplementary Files**

File Name: Supplementary Movie 1

Description: A realization of the “Replicase R2” metabolism in a flow at high Damkoehler number ( $Da=1,000$ ).

File Name: Supplementary Movie 2

Description: A realization of the “Replicase R2” metabolism in a flow at low Damkoehler number ( $Da=0.001$ ).

File Name: Supplementary Movie 3

Description: A realization of the “Replicase R2” metabolism in a flow at  $Da=1$ .
